# Supplementary material for: Impact of Enniatin B and Beauvericin on Lysosomal Cathepsin B Secretion and Apoptosis Induction
Source: MDPI journal article supplement (doi:10.3390/ijms24032030), 2023-01-19
Supplement: s1 [file s1]

## Supplementary Data

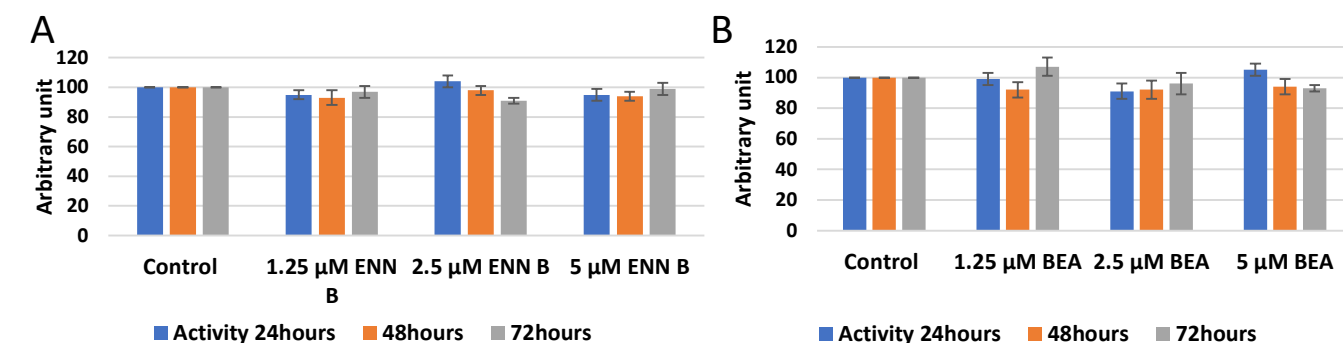

**Figure S1.** Impact of ENN B and BEA on proteolytic activities of cathepsin L in cellular extracts. (A) Cathepsin L activities were measured using cathepsin L specific substrate Z-F-R.AMC in cellular extracts after treatment with different ENN B and different periods concentrations. (B) Cathepsin L activities measured after treatments with different concentration for different periods with BEA. The data were analyzed using two-way ANOVA with Bonferroni's or Dunnett's post hoc analysis (\* $p < 0.05$ ; \*\* $p < 0.01$ ; \*\*\* $p < 0.001$ ;  $N = 7$ ). Statistics was calculated using GraphPad Prism.

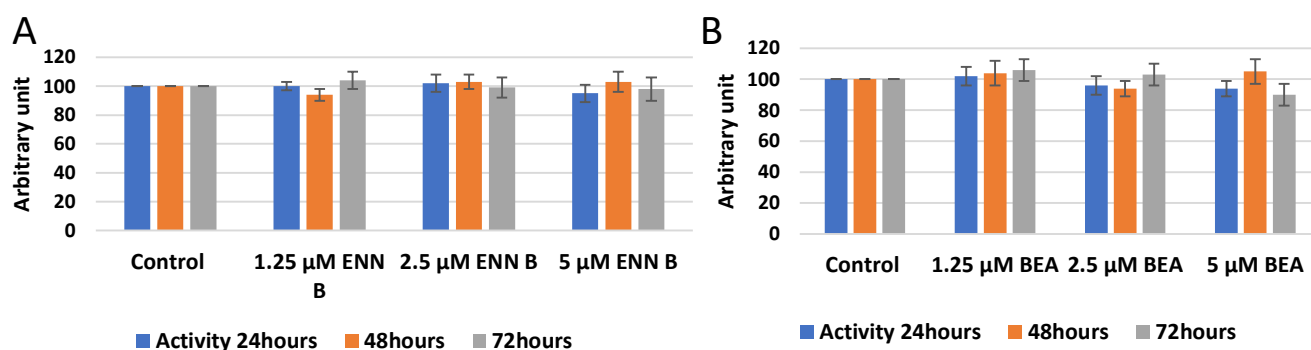

**Figure S2.** Impact of ENN B and BEA on proteolytic activities of Cathepsin L in media. (A) cathepsin L activities were measured using cathepsin L specific substrate Z-F-R.AMC in media after treatment with different ENN B and different concentrations for different periods. (B) cathepsin L activities measured in media after treatment with different concentrations of BEA for different periods. The data were analyzed using two-way ANOVA, Statistics was calculated using GraphPad Prism.

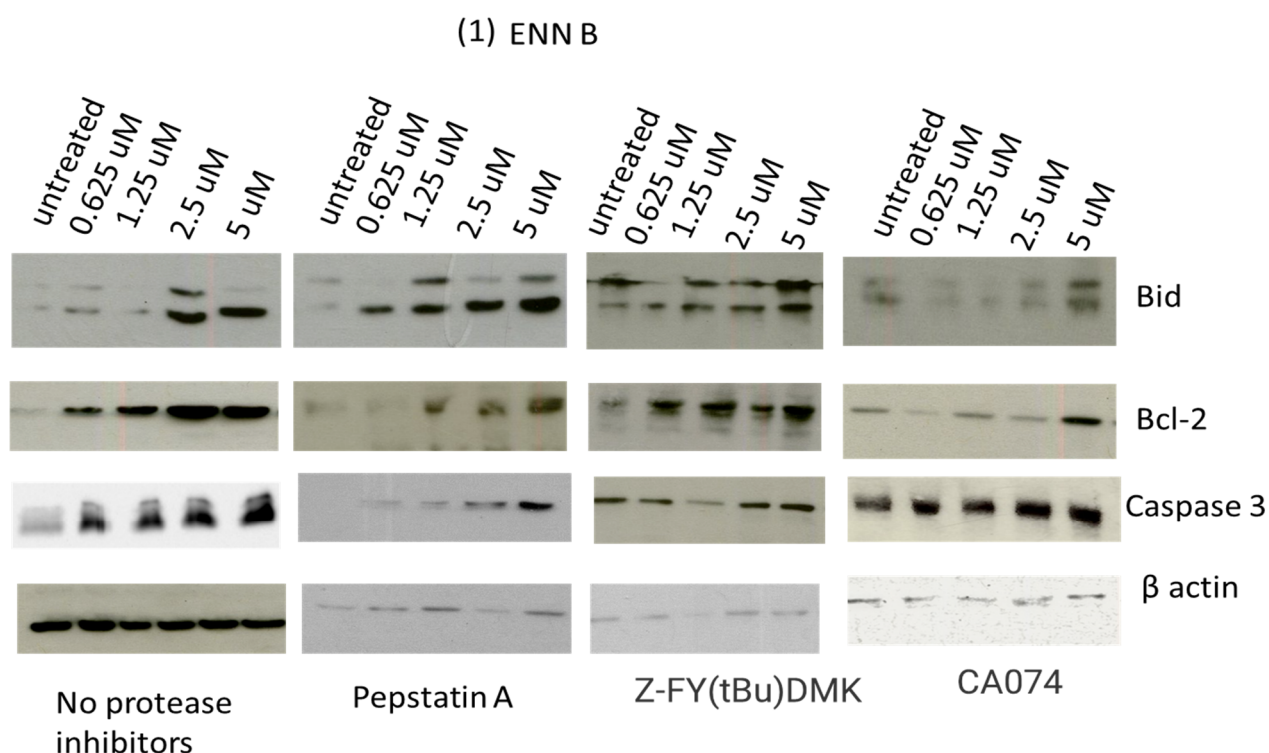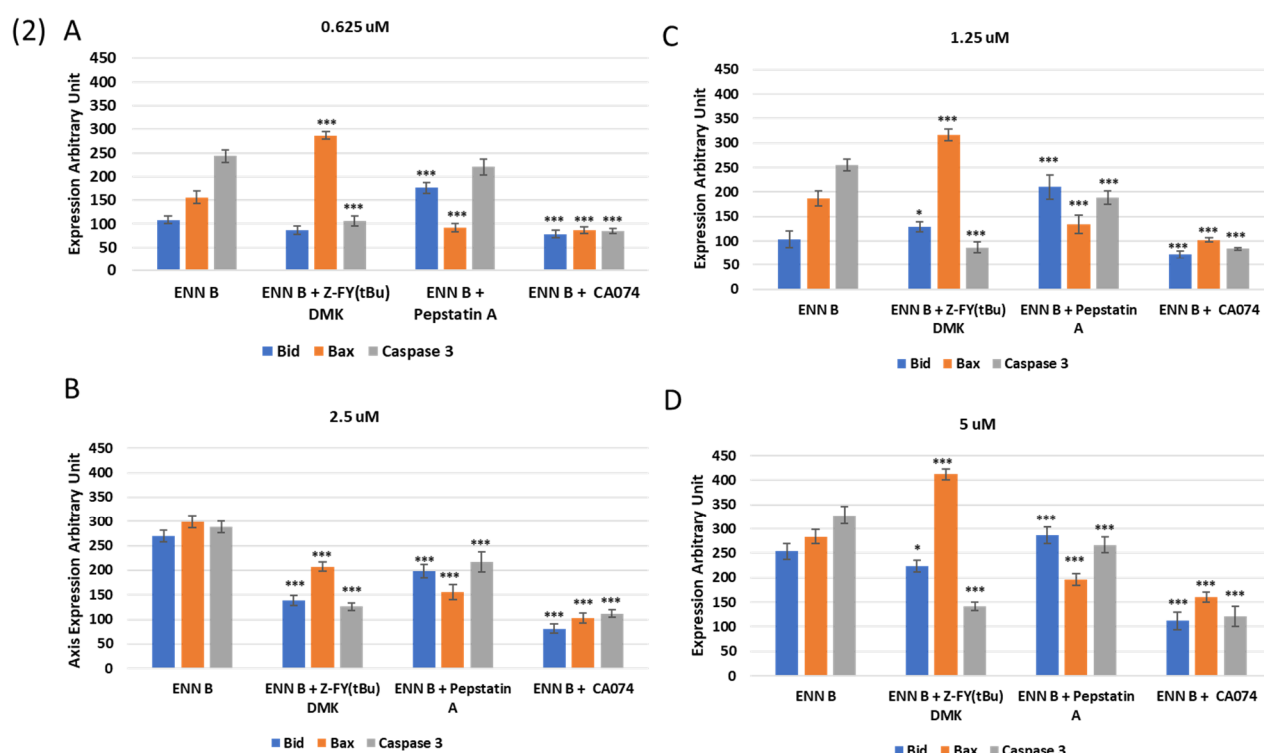

**Figure S3.** Impact of ENN B treatment on the expressions of some apoptotic proteins. (3.1) Western blot analysis of cleaved Bid, cleaved Bcl-2 and cleaved caspase 3 expression in KB-31- cells treated with 0, 0.625, 1.25, 2.5 and 5  $\mu$ M ENN B for 24 h in the presence and absence of 10  $\mu$ M of cathepsin D inhibitor pepstatin A or the same concentration of cathepsin L inhibitor Z-FY (tBu)DMK or cathepsin B inhibitor CA074.  $\beta$ -actin was used as an internal control. (3.2, A, B, C and D) Evaluation of cleaved Bid, cleaved Bcl-2 and cleaved caspase 3 expression after treatment with 0, 0.625, 1.25, 2.5 and 5  $\mu$ M ENN B for 24 h in the presence and absence of 10  $\mu$ M of cathepsin D, cathepsin L or cathepsin B specific inhibitors. The data were analyzed using two-way ANOVA with Dunnett's post hoc analysis (\* $p$  < 0.05; \*\* $p$  < 0.01; \*\*\* $p$  < 0.001; N = 7). Statistics was calculated using GraphPad Prism.

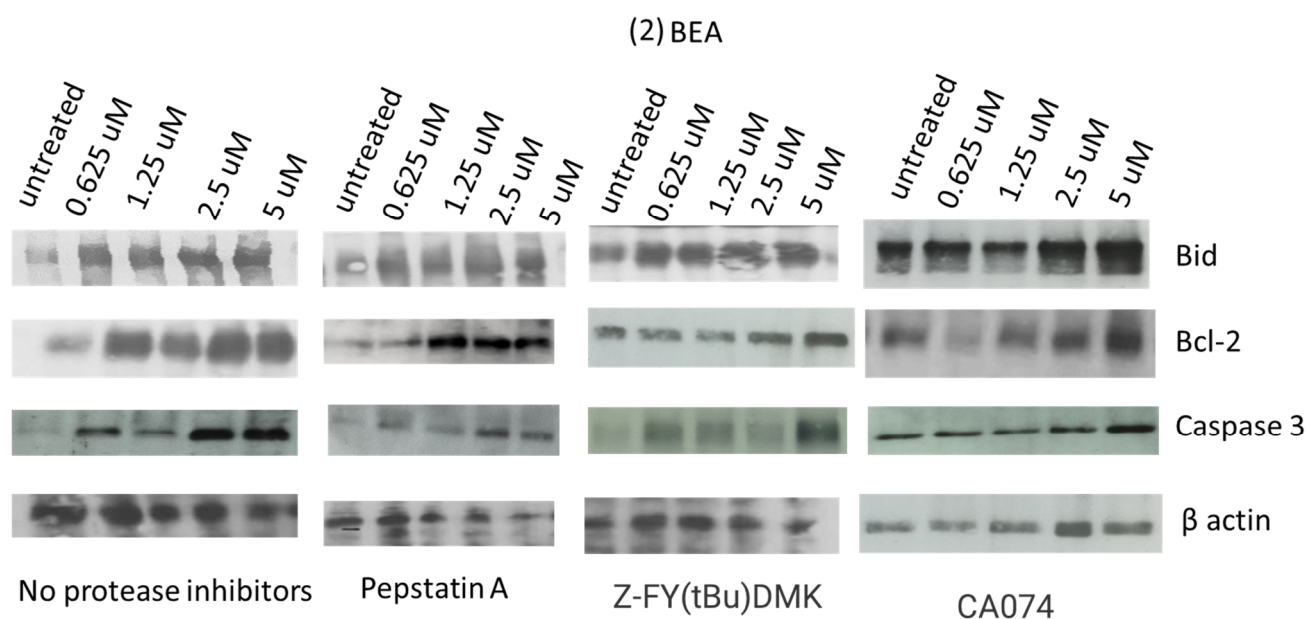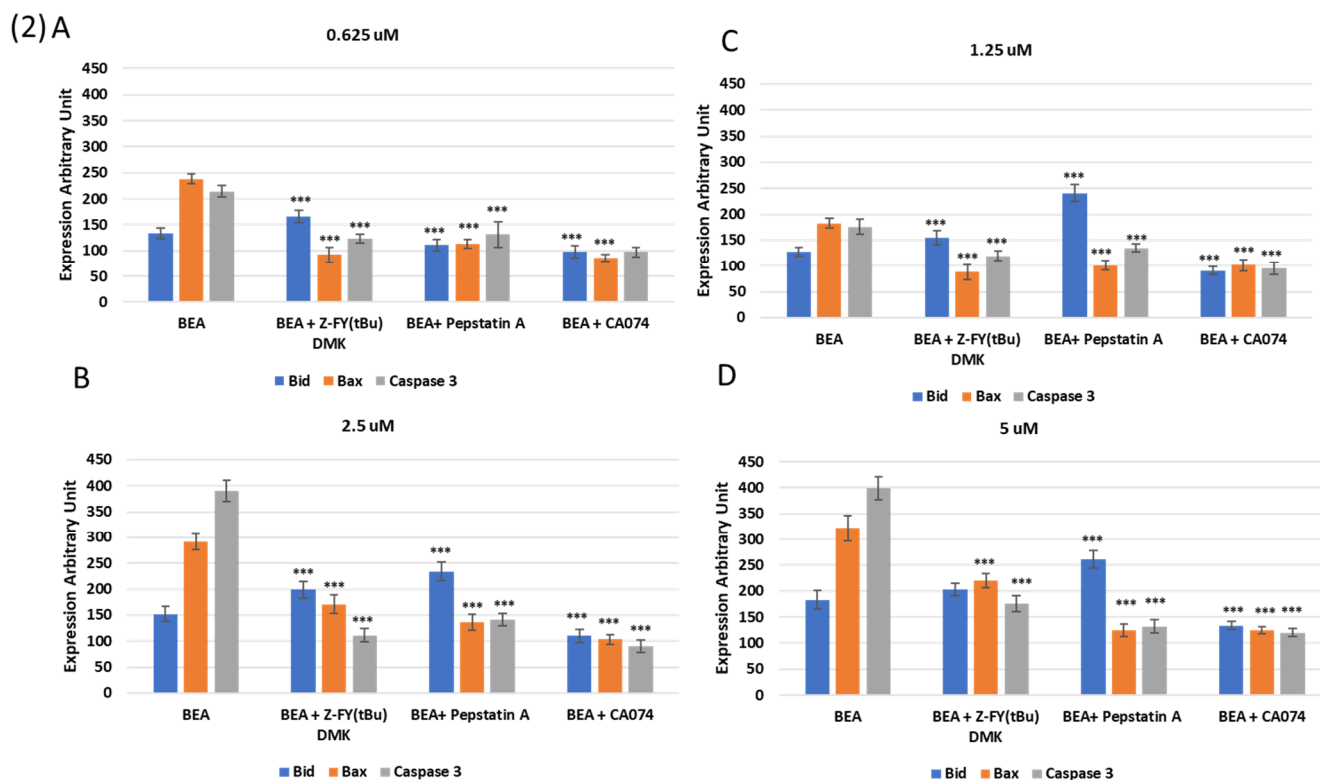

**Figure S4.** Impact of BEA treatment on the expressions of some apoptotic proteins. (4.1) Western blot analysis of cleaved Bid, cleaved Bcl-2 and cleaved caspase 3 expression in KB-31- cells treated with 0, 0.625, 1.25, 2.5 and 5  $\mu$ M BEA for 24 h in the presence and absence of 10  $\mu$ M of cathepsin D inhibitor pepstatin A or the same concentration of cathepsin L inhibitor Z-FY (tBu)DMK or cathepsin B inhibitor CA074.  $\beta$ -actin was used as an internal control. (4.2, A, B, C and D). Evaluation of cleaved Bid, cleaved Bcl-2 and cleaved caspase 3 expression after treatment with 0, 0.625, 1.25, 2.5 and 5  $\mu$ M BEA for 24 h in the presence and absence of 10  $\mu$ M of cathepsin D, cathepsin L or cathepsin B specific inhibitors. The data were analyzed using two-way ANOVA with Dunnett's post hoc analysis (\* $p$  < .05; \*\* $p$  < .01; \*\*\* $p$  < .001; N = 7). Statistics was calculated using GraphPad Prism.
